# Supplementary material
Source: HighWire-hosted journal article supplement (https://jnm.snmjournals.org/highwire/filestream/94208/field_highwire_adjunct_files/0/jnm085167_Supplemental_Data.pdf)
Supplement: jnm085167_Supplemental_Data.pdf [file jnm085167_Supplemental_Data.pdf]

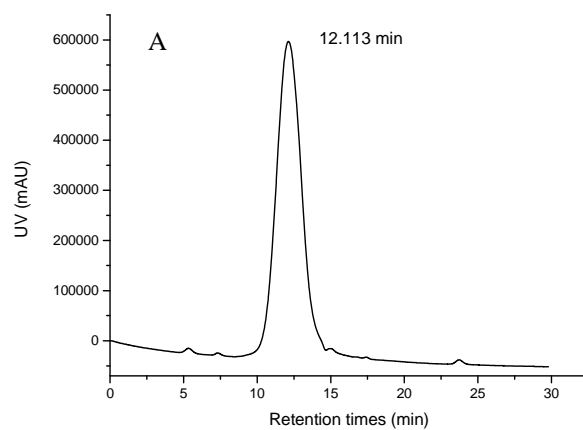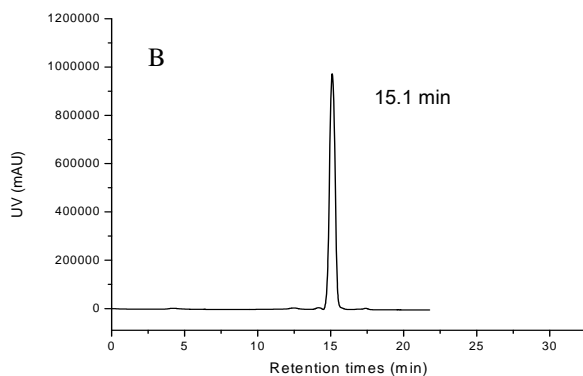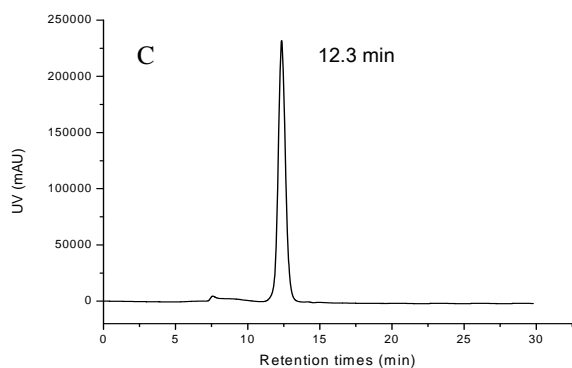

SUPPLEMENTAL FIGURE 1. The SEC-HPLC chromatograms of P(VLA-co-VNI) (the molecular weight was calculated as 47 kD), dextran standard (mw 5.9 kD) and HSA (mw 66 kD) using TSK-GEL G4000PWxl column, 0.2 mol/L PB buffer was used as eluent at a flow rate of 0.7 mL/min. The retention time of P(VLA-co-VNI) was 12.1 min (A). The retention time of dextran standard was 15.1 min (B). The retention time of HSA was 12.3 min (C).

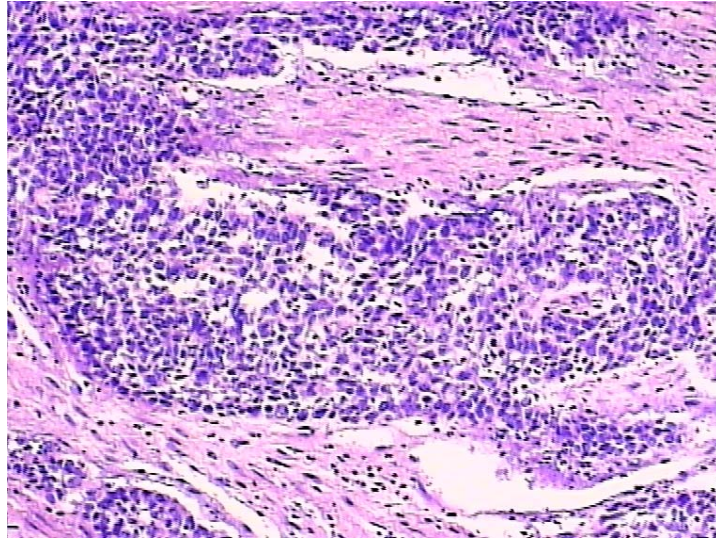

SUPPLEMENTAL FIGURE 2. Pathological examination of the primary VXII hepatocellular liver cancer. The tumor in the rabbit liver was determined by pathological examination after SPECT-CT imaging study.
